# Supplementary material for: Activation of Xer-recombination at dif: structural basis of the FtsKγ–XerD interaction
Source: PubMed Central journal article supplement (PMC5052618; doi:10.1038/srep33357), 2016-10-06
Supplement: srep33357-s1.pdf [file srep33357-s1.pdf]

# Activation of Xer-recombination at *dif*: structural basis of the FtsK $\gamma$ –XerD interaction

Andrew N. Keller<sup>1#</sup>, Yue Xin<sup>1#</sup>, Stephanie Boer<sup>1</sup>, Jonathan Reinhardt<sup>2</sup>, Rachel Baker<sup>2</sup>, Lidia K. Arciszewska<sup>2</sup>, Peter J. Lewis<sup>1</sup>, David J. Sherratt<sup>2</sup>, Jan Löwe<sup>3</sup>, Ian Grainge<sup>1\*</sup>.

## Supplementary material

### Methods:

#### ***In vivo* recombination reaction details.**

*In vivo* recombination reactions using XerD- $\gamma$  were carried out as previously described <sup>1,2</sup>. Briefly, the reporter strain consisted of *Escherichia coli* DS9041 (FtsK<sub>C</sub><sup>-</sup>) transformed with a 2x *dif* reporter plasmid, pFX142, which is based on a pSC101 replication origin and encodes resistance to spectinomycin and kanamycin. *xerD*- $\gamma$  fusions and variants carrying mutations in the XerD portion were cloned into pBad24 <sup>3</sup>. Individual expression plasmids were transformed in to the reporter strain and selected with ampicillin, spectinomycin and kanamycin. Colonies were grown for 16 hours in LB, without induction with arabinose. Sufficient expression from the *P*<sub>BAD</sub> promoter occurs in this time to allow resolution of the majority of the reporter plasmid with “wt” XerD- $\gamma$ . Plasmid DNA is isolated at this time and electrophoresed in 0.8% agarose in 1x TBE at 55V for 16 hours. It should be noted that in this system, wt XerD is also expressed from the chromosome and may contribute to higher background levels of recombination using the XerD- $\gamma$  variant proteins. The recombination percentages shown in Figure 2 for each XerD- $\gamma$  variant could be artificially high as the FtsK $\gamma$  domain from the fusion could interact and activate the wt XerD from the chromosome. However, reduction in recombination does imply the XerD variants are compromised in their ability to stimulate recombination.

**Table S1:** Average B-factors for residues involved in the XerD<sub>C</sub>:FtsK $\gamma$  interaction

| XerD <sub>C</sub> Residue | MC B-factor | SC B-factor | Overall B-factor |      |
|---------------------------|-------------|-------------|------------------|------|
| 119                       | GLU         | 46.2        | 57.5             | 52.5 |
| 123                       | GLN         | 43.7        | 53.0             | 48.8 |
| 127                       | ILE         | 42.0        | 45.7             | 43.8 |
| 184                       | GLU         | 38.1        | 47.6             | 43.3 |
| 187                       | TYR         | 37.2        | 40.0             | 39.1 |
| 188                       | TRP         | 34.8        | 35.9             | 35.6 |
| 257                       | HIS         | 47.0        | 52.2             | 50.1 |

| FtsK $\gamma$ Residue | MC B-factor | SC B-factor | Overall B-factor |       |
|-----------------------|-------------|-------------|------------------|-------|
| 1288                  | GLN         | 93.6        | 91.8             | 92.6  |
| 1289                  | ARG         | 98.8        | 103.3            | 101.7 |
| 1292                  | ARG         | 93.4        | 103.8            | 100.1 |
| 1293                  | ILE         | 89.1        | 92.7             | 90.9  |
| 1296                  | ASN         | 90.8        | 90.3             | 90.6  |

- Calculated using CCP4i implementation of *BAVERAGE*
- MC: Main Chain, SC: Side chain

```

1 MKDLSEAQVERLLQAPLIDQPLELRDKAMLEVLYATGLRVSELVGLTMSD 50
51 ISLRQGVVVRVIGKGNKERLVPLGEEAVYWLETYLEHGRPWLLNGV SIDVL 100
101 FPSQRAQQMTRQTFWHRIKHAYAVLAGIDSEKLSPHVLRHAFATHLLNHGA 150
151 DLRVVQMLLGHSDDLSTTQIYTHVATERLRQLHQQHHPRAGGGSEGGGSEG 200
201 GSGSRTGAEELDPLFDQAVQFVTEKRKASISGVQRQFRIGYNRAARI IEQ 250
251 MEAQGIVSEQGHNGNREVLAPPPFD 275

```

**Figure S1: Sequence of the construct used for crystallography showing the regions with no electron density.** The sequence is colour-coded as in Figure 1, with the XerD<sub>C</sub> portion in orange and the FtsK<sub>γ</sub> domain in green. The linker sequence is shaded grey. Bold black underlines represent amino acids for which the electron density was insufficient and thus are not modelled in the structure in Figure 1.

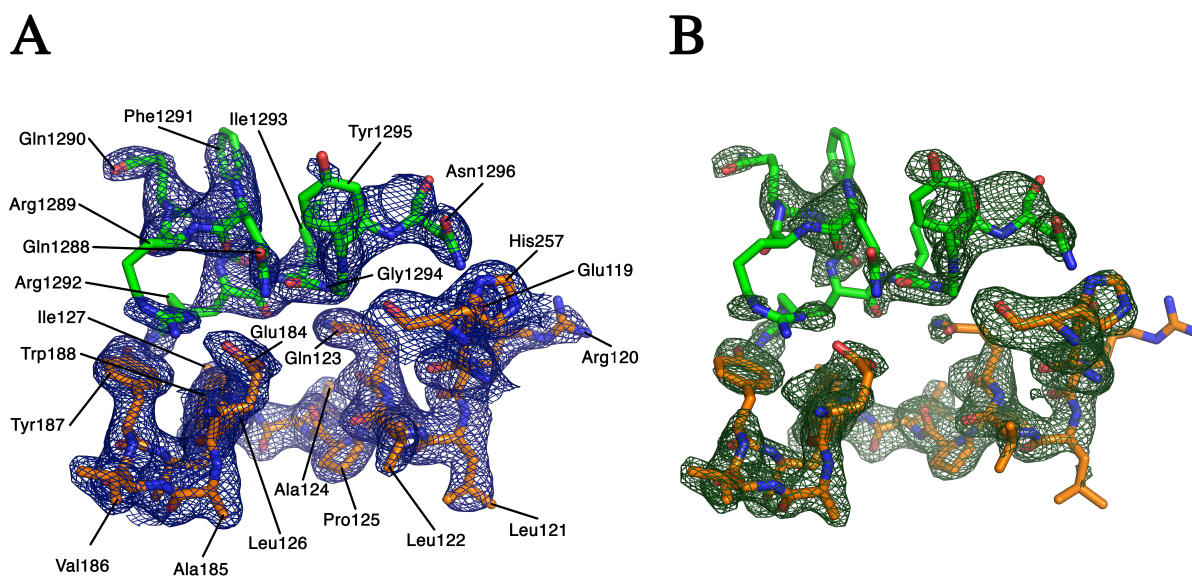

**Figure S2: Working and omit maps of the XerD<sub>C</sub>-FtsK<sub>γ</sub> interface.** A) (2Fo-Fc) map (blue mesh) contoured at 1.0  $\sigma$  for FtsK<sub>γ</sub> (green sticks) and 1.3  $\sigma$  for XerD<sub>C</sub> (orange sticks). B) (Fo-Fc) simulated annealing omit map (green mesh) of residues shown in (A) contoured at 2.9  $\sigma$ .

A)

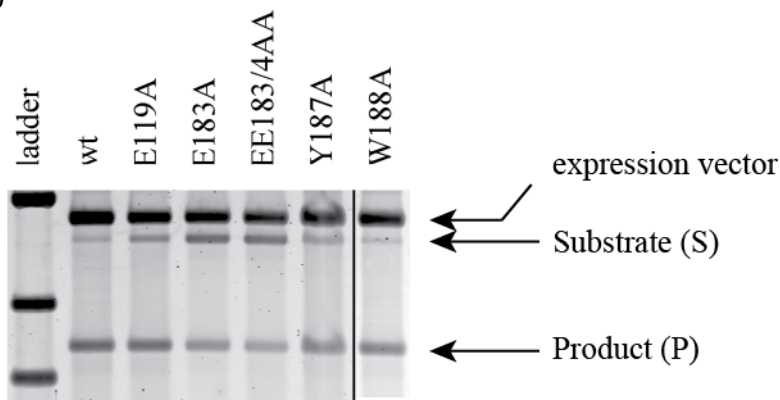

B)

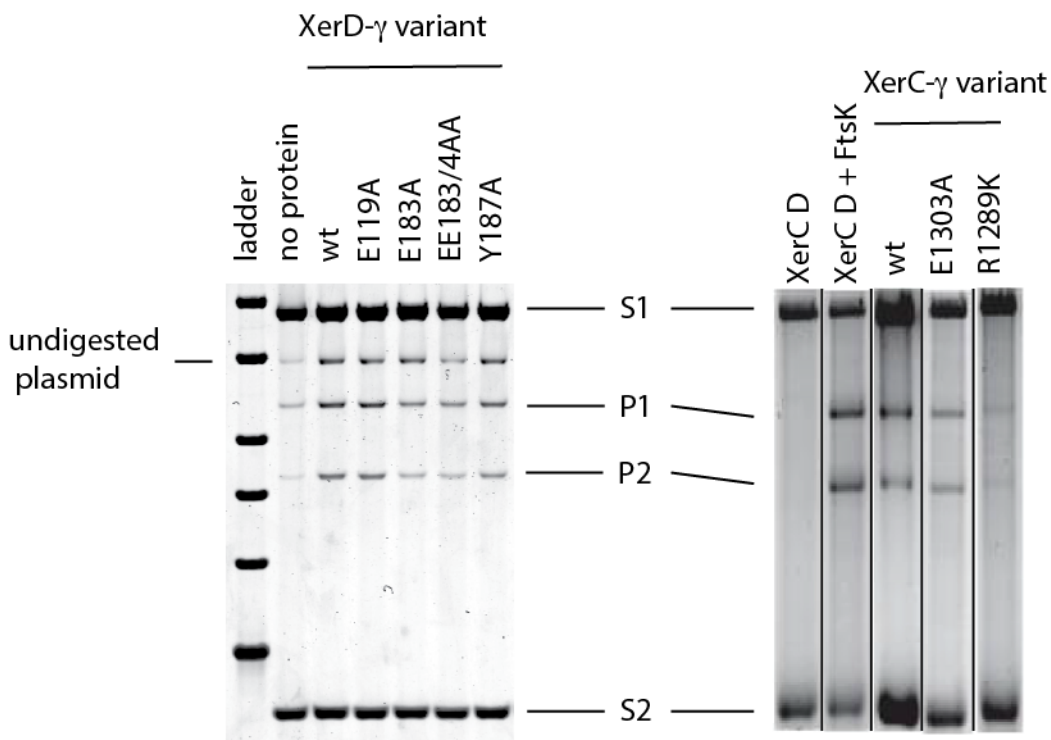

**Figure S3. Typical gel images of recombination data shown in Figure 2. A)** *in vivo* recombination reactions showing expression of XerD- $\gamma$  fusion proteins with mutations as indicated. The XerD- $\gamma$  variants are expressed from the pBad based vector (expression vector). Upon recombination the substrate plasmid (S) is converted to product (P). **B)** *in vitro* recombination reactions. Plasmid was cut with restriction enzyme as described<sup>1</sup> then electrophoresed. Digestion of the parental substrate plasmid yields two bands, S1 and S2, while digestion of the recombination product yields two linear products of different sizes, P1 and P2. The gel on the left also shows some undigested plasmid, and a low background level of recombination that occurred prior to purification of the plasmid substrate.

```

XerD_E.coli      MKQDLARIEQFLDALWLEKNLAENTLNAYRRDLSMMVEWLHHRGLTLATAQSDDLQALLA 60
XerC_E.coli      MTDLHTDVERYLRYSVERQLSPITLLNYQRQLEAIINFASENGLQSWQQCDVTMVRNFA 60
XerA_P.abysssi   ----MEEREERVRRDDTIEEFATYLELEGKSRNTVVMYTYYYISKFFEEGHSPTARDALRFL 56
                  *. :      :*. :      *      *:      :      :      . :      :
                  :

XerD_E.coli      ERLEG-GYKATSSARLLSAVRRLEFQYLYREKRFREDDPSAHLASPKLPQRLPKDLSEAQVE 119
XerC_E.coli      VRSRRKGLGAASLALRLSALRSFFDWLVSQNELKANPAKGVSAKAPRHLPKNIDVDDMN 120
XerA_P.abysssi   AKLKRKGYSTRSLNLVIQALKAYFKFEG-----LDSEAEKLTTPKMPKTLPKSLTEEEVR 111
                  : . * : * :.*:: *.:      . : : ** * : **.: :.

XerD_E.coli      RLLQAPLIDQPLELRDKAMLEVLYATGLRVSELVGLTMSDISLRQGVVVRVIG-KGNKERL 178
XerC_E.coli      RLLDID-INDPLAVRDRAMLEVMYGAGLRRLSELVGLDIKHLDESSEVWVMG-KGSKERR 178
XerA_P.abysssi   RIINAA-----ETLRDRLILLLLYGAGLRVSELCNLRVEDVNFYGVIVVRGGKGGKDRV 166
                  *:::      :*: : * :*:**:* * . * :.:.:. * : * * **.*:*

XerD_E.coli      VPLGEEAVYWLETYLEHGRPWLLNGVVSIDVLFPSQRAQQMTRQTFWHRIKHVAVLAGIDS 238
XerC_E.coli      LPIGRNAVAVIEHWLDLRD---LFGSEDDALFLSKLGRISARNVQKRFAEWGIKQGLNN 235
XerA_P.abysssi   VPISESLSEIKRYLESRND---DSPYLFVEMKRKRKDKLSPKTVWRLVKKYGRKAGVEL 223
                  :*:. . . : : : * :      .      . : : :. :. : . . . * :

XerD_E.coli      EKLSPHVLRRHAFATHLLNHGADLRVQMLLGHSDLSTTQIYTHVATERLRQLHQHHPRA 298
XerC_E.coli      -HVHPHKLRRHSFATHMLESSGDLRGVQELLGHANLSTTQIYTHLDFQHLASVYDAAHPRA 294
XerA_P.abysssi   ---TPHQLRRHSFATHMLERIGIDIRIIQELLGHSNLSTTQIYTKVSTKHLKEAVKKAKLVE 280
                  ** **:*:***:*: . *:* :* ***:**:*:*****:*: ::* . . :

XerD_E.coli      -----
XerC_E.coli      KR GK-- 298
XerA_P.abysssi   SIIGGS 286

```

**Figure S4: Alignment of XerC, XerD and XerA**

The sequences of XerC and XerD from *E. coli* and XerA from *Pyrococcus abyssi* were aligned using Clustal Omega <sup>4</sup>. The important catalytic residues, which are conserved throughout the tyrosine-recombinase family, are highlighted by grey boxes. Note the different C-terminal tails of XerC and XerD.

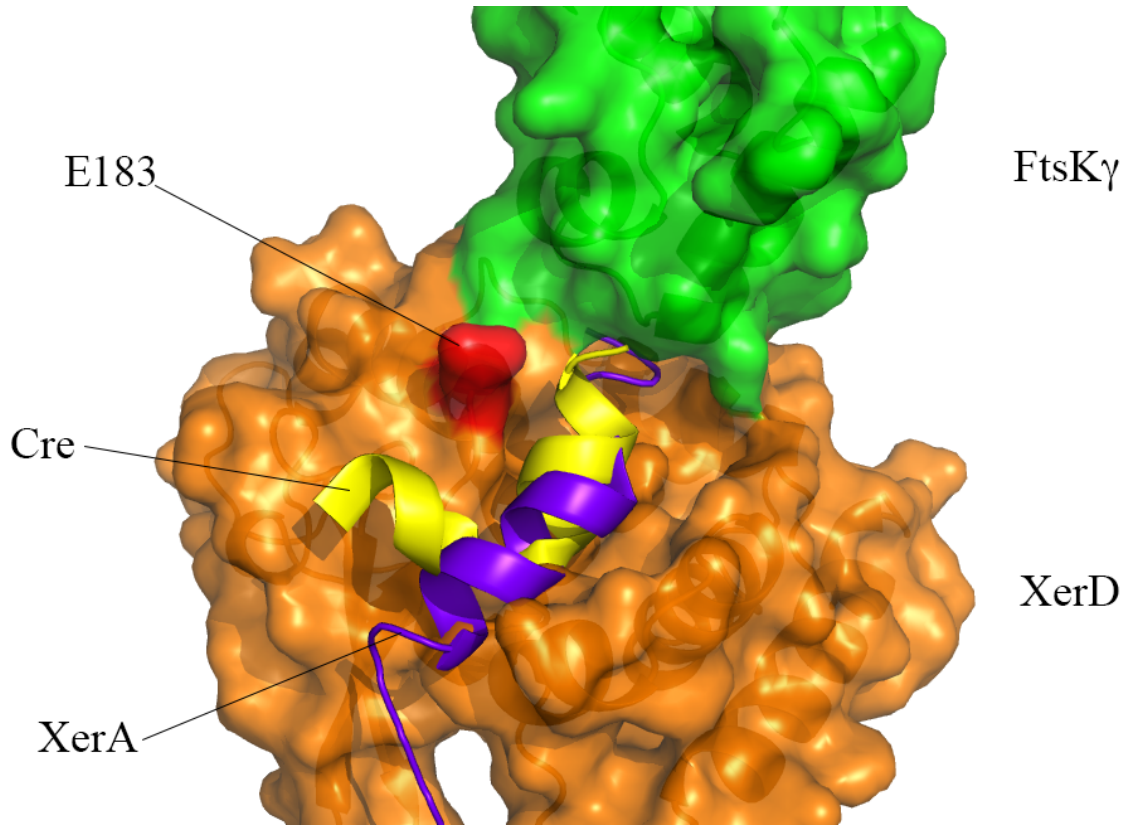

**Figure S5: Model showing the C-terminal tails of Cre and XerA occupying the cleft of XerD**

The “activated” conformation of XerD is shown in orange with the FtsK $\gamma$  domain in green. Structural alignments were used to place the C-termini of Cre (yellow) and XerA (blue) onto the corresponding position in XerD. Both occupy the putative cleft where the C-terminus of XerC is expected to interact. The position of the negatively charged E183 is shown, located at the end of the cleft close to the position where FtsK $\gamma$  sits.

|                      |                                                                                                                           |                         |                |
|----------------------|---------------------------------------------------------------------------------------------------------------------------|-------------------------|----------------|
| <i>L. lactis</i>     | — ARNMVIIAQKASTAQLORALKVGFNRASDLMNELEAQGI—                                                                                | FtsK $\gamma$ sequences |                |
| <i>E. coli</i>       | — AVQFVTEKRKASISGVQRQFRIGYNRAARIIEQMEAQGI—                                                                                |                         |                |
| <i>H. influenzae</i> | — VMDFVINTGTTSVSSIQRKFSVGFNRAARIMDQEEQGI—<br>:* .:* : ** : : * : * * * : : : : * * * *                                    |                         |                |
| <i>L. lactis</i>     | — KTLSNRARSSFFKNERDLAIIALILASGIRLSEAVNVDLRDLNLITMVEVTRKGGKRD                                                              | 239                     | XerD sequences |
| <i>H. influenzae</i> | — SDLLN—TPNVEVPLELRDKAMLELLYATGLRVTELVSLETIENMSVQQGVVVRVIGKGNKER                                                          | 176                     |                |
| <i>E. coli</i>       | — ERLIQ—APLIDQPLELRDKAMLEVLYATGLRVSELVGLTMSDISLRQGVVVRVIGKGNKER<br>* : : : * * * : : : * : * : : : : : * * * * * * *      | 177                     |                |
| <i>L. lactis</i>     | AVPYAPFAKTYFERYLEVRSORYKTTAKDTAFFVTLYRDVPSRIDPSSVEKLVAKYSQAFK                                                             | 299                     |                |
| <i>H. influenzae</i> | IVPMGEEAAYWVRQFMLYGRPVLLNGQSSDVVFPSSQRAQOMTROTTFWHRVKHYAILADIDA                                                           | 236                     |                |
| <i>E. coli</i>       | LVPLGEEAVVWLETYLEHGRPWLLNGVSDVLFPSQRAQOMTROTTFWHRVKHYAVLAGIDS<br>* * . * * : : . : : . . . * : : : * * * :                | 237                     |                |
| <i>L. lactis</i>     | VRVTPHKLRHTLATRLYAQTNQVLSVNLGHASTQVTDLYTHIINEEQNALDNL----                                                                 | 256                     |                |
| <i>H. influenzae</i> | DALSPHVLRRHAFATHLVNHGADLRVVQMLLGHSTDLSTQIYTHVAKERLKRHERFHPRG                                                              | 297                     |                |
| <i>E. coli</i>       | EKLSPHVLRRHAFATHLLNHGADLRVVQMLLGHSDLSTQIYTHVATERLRQLHQQHHPRA<br>: * * * * * : : . : * . * * * . . . : * * * : * . : . . : | 298                     |                |

**Figure S6: Alignments showing the level of conservation of interacting residues in FtsK $\gamma$  and XerD across selected species. Top:** Alignment of the amino acid sequences of the FtsK $\gamma$  domains of the indicated organisms in the region where interaction with XerD occurs. Amino acids in grey boxes are the ones observed to interact with XerD in the crystal structure presented here for *E. coli*. **Bottom:** Alignments of the C-terminal portions of XerDs from *E. coli* and *H. influenzae*, and the single Xer recombinase, XerS, from *Lactococcus lactis*. White boxes denote amino acids seen to interact with FtsK $\gamma$  in the crystal structure from *E. coli*, whereas grey boxes represent the conserved catalytic residues distinctive of the tyrosine recombinase family. Alignments are from Clustal Omega <sup>4</sup>.

#### References:

1. Grainge, I., Lesterlin, C. & Sherratt, D.J. Activation of XerCD-dif recombination by the FtsK DNA translocase. *Nucleic Acids Res* **39**, 5140-8 (2011).
2. Sivanathan, V. et al. KOPS-guided DNA translocation by FtsK safeguards Escherichia coli chromosome segregation. *Mol Microbiol* **71**, 1031-42 (2009).
3. Guzman, L.M., Belin, D., Carson, M.J. & Beckwith, J. Tight regulation, modulation, and high-level expression by vectors containing the arabinose PBAD promoter. *J Bacteriol* **177**, 4121-30 (1995).
4. Sievers, F. et al. Fast, scalable generation of high-quality protein multiple sequence alignments using Clustal Omega. *Mol Syst Biol* **7**, 539 (2011).
